# Supplementary material for: The magnetic susceptibility effect of gadolinium-based contrast agents on PRFS-based MR thermometry during thermal interventions
Source: PubMed Central journal article supplement (PMC4265976; doi:10.1186/2050-5736-1-8), 2013-06-04
Supplement: 2050-5736-1-8-S1.pdf [file 2050-5736-1-8-S1.pdf]

SUPPLEMENTAL INFORMATION

**The magnetic susceptibility effect of gadolinium-based contrast agents on PRFS-based MR thermometry during thermal interventions**

Nicole M Hijnen<sup>1\*</sup>, Aaldert Elevelt<sup>2\*</sup>, Jeroen Pikkemaat<sup>2</sup>, Clemens Bos<sup>3</sup>, Lambertus W. Bartels<sup>3</sup>, Holger Gruell<sup>1,2</sup>.

\* Both authors contributed equally to this paper

<sup>1</sup> Biomedical NMR, Department of Biomedical Engineering, Eindhoven University of Technology, the Netherlands

<sup>2</sup> Department of Minimally Invasive Healthcare, Philips Research Eindhoven, the Netherlands

<sup>3</sup> Image Sciences Institute/Department of Radiology, University Medical Center Utrecht, the Netherlands.

*Phantom measurements: temperature dependence of susceptibility*

The <sup>1</sup>H-NMR spectra measured for the three Gd-DTPA concentrations (0 mM, 3.13 mM, and 4.67 mM) at each temperatures (T = 37 °C, 41 °C, 45 °C, 50 °C, and 55 °C) are shown in Supplemental figures 1-3.

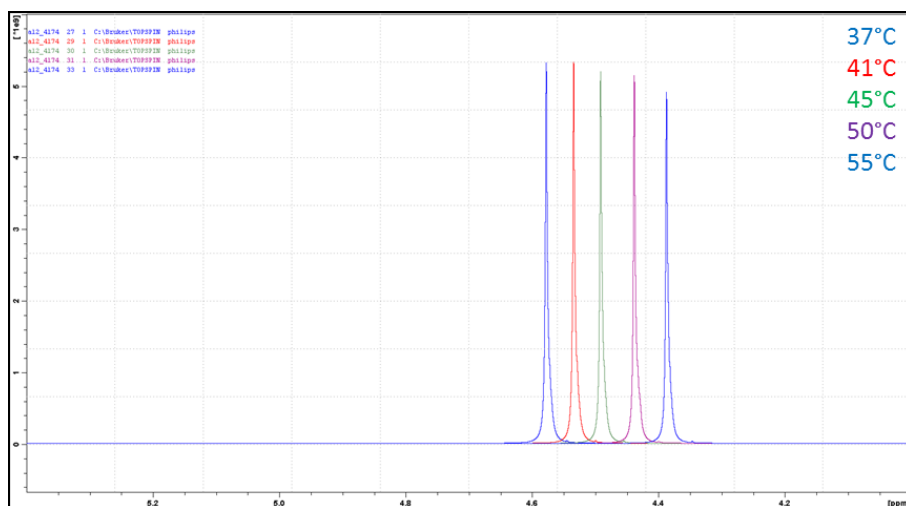

**Supplemental figure 1:** Overlay of the <sup>1</sup>H-NMR spectra of water at five different temperatures.

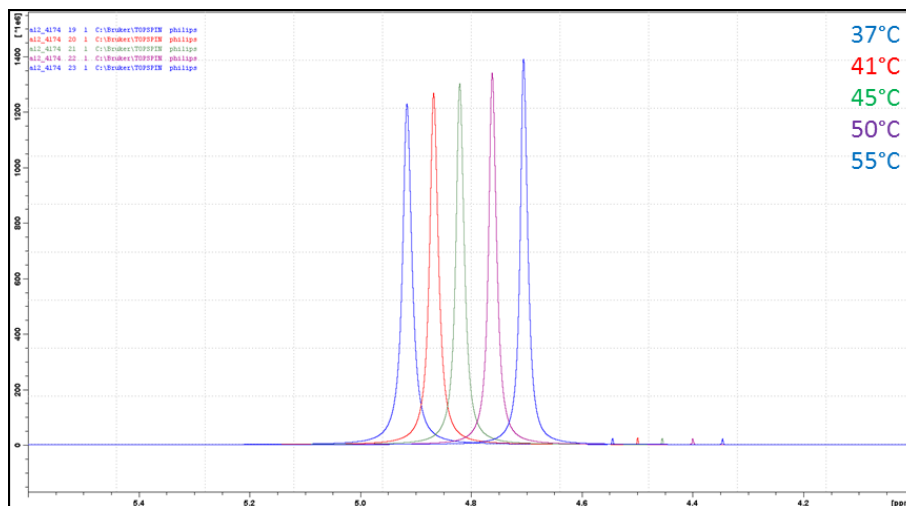

**Supplemental figure 2:** Overlay of the <sup>1</sup>H-NMR spectra of the 3.128 mM Gd-DTPA sample at five different temperatures. The five peaks with a high intensity shifted towards higher frequency originated from the water in the Gd-DTPA containing outer compartment. The low intensity signals originated from the water protons in the diamagnetic inner compartment.

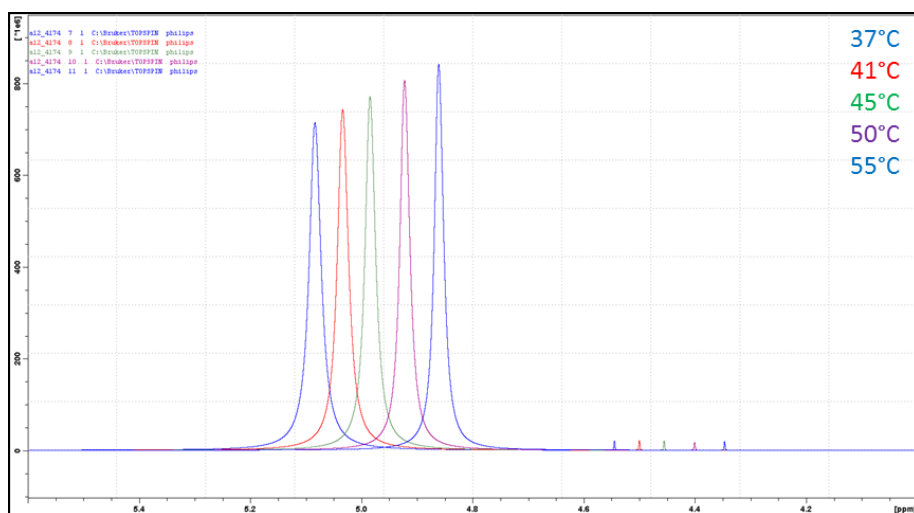

**Supplemental figure 3:** Overlay of the  $^1\text{H}$ -NMR spectra of the 4.667 mM Gd-DTPA sample at different temperatures. The five peaks with a high intensity shifted towards higher frequency originated from the water in the Gd-DTPA containing outer compartment. The low intensity signals originated from the water protons in the diamagnetic inner compartment.

**Supplemental table 1:** Chemical shift positions ( $\delta$ ) of the water signal at different temperatures and Gd-DTPA concentrations. From the change in chemical shift positions, the BMS shift per mM Gd-DTPA was calculated.

| Sample temperature (°C) | Sample temperature (K) | $\delta$ (ppm) pure water | $\delta$ (ppm) 3.128 mM Gd-DTPA | BMS shift (ppm) 3.128 mM Gd-DTPA | BMS shift per mM (ppm/mM) 3.128 mM data | $\delta$ (ppm) 4.667 mM Gd-DTPA | BMS shift (ppm) 4.667 mM Gd-DTPA | BMS shift per mM (ppm/mM) 4.667 mM data |
|-------------------------|------------------------|---------------------------|---------------------------------|----------------------------------|-----------------------------------------|---------------------------------|----------------------------------|-----------------------------------------|
| 37.0                    | 310.15                 | 4.5773                    | 4.9162                          | 0.339                            | 0.108                                   | 5.0844                          | 0.507                            | 0.109                                   |
| 41.0                    | 314.15                 | 4.5337                    | 4.8678                          | 0.334                            | 0.107                                   | 5.0341                          | 0.500                            | 0.107                                   |
| 45.0                    | 318.15                 | 4.4911                    | 4.8208                          | 0.330                            | 0.105                                   | 4.9848                          | 0.494                            | 0.106                                   |
| 50.0                    | 323.15                 | 4.4380                    | 4.7622                          | 0.324                            | 0.104                                   | 4.9227                          | 0.485                            | 0.104                                   |
| 55.0                    | 328.15                 | 4.3870                    | 4.7054                          | 0.318                            | 0.102                                   | 4.8612                          | 0.474                            | 0.102                                   |

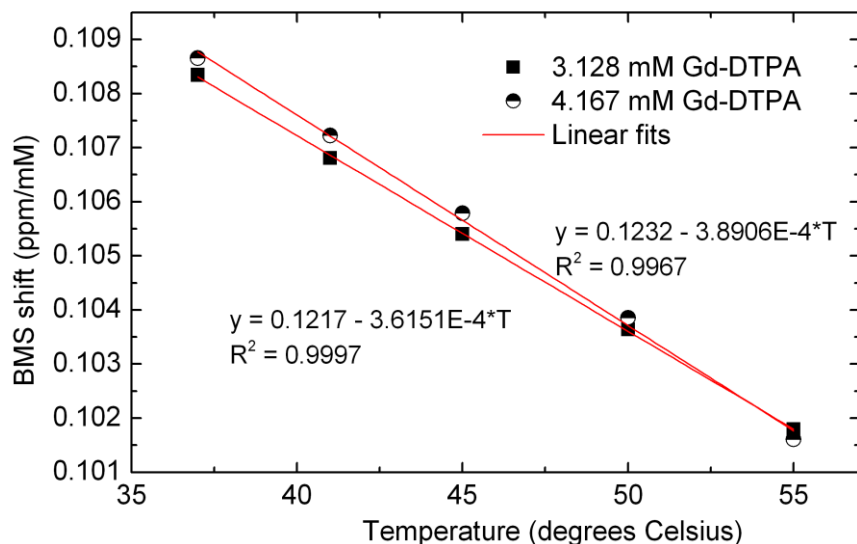

**Supplemental figure 4:** The BMS shift of the Gd-DTPA containing samples plotted against temperature. The slope of the linear fits represents the temperature dependency of the Gd-DTPA susceptibility ( $d\Delta\chi_{\text{Gd-DTPA}}/dT \approx -0.00038 \pm 0.00008 \text{ ppm/mM/}^\circ\text{C}$ ).

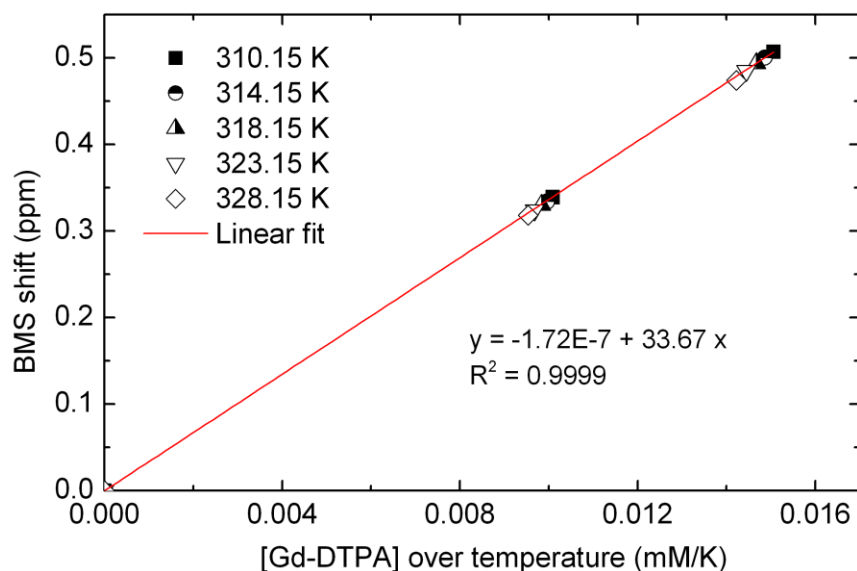

**Supplemental figure 5:** The absolute BMS shift plotted against the Gd-DTPA concentration over temperature in Kelvin. The resulting values of  $\Delta\chi$  showed a linear correlation with the concentration-to-temperature ratio. Fitting with a linear model function yielded an excellent fit with an abscissa of almost zero and a slope of  $33.67 \text{ ppm}\cdot\text{K}\cdot\text{mM}^{-1}$  ( $R^2 = 0.9999$ ), corresponding closely to the theoretical value,  $4\pi s(\mu_{\text{eff}}/2.84)^2 = 32.74 \text{ ppm}\cdot\text{K}\cdot\text{mM}^{-1}$ , where  $s = 1/3$  the shape factor for a cylinder parallel to the main magnetic field, and  $\mu_{\text{eff}} = 7.94$  for gadolinium (III) [1].

## References

[1] Corsi DM, Platas-Iglesias C, van Bekkum H, Peters JA. Determination of paramagnetic lanthanide(III) concentrations from bulk magnetic susceptibility shifts in NMR spectra. *Magnetic Resonance in Chemistry*. 2001;39:723-6.
